# Supplementary material for: The Association between Dysnatraemia during Hospitalisation and Post-COVID-19 Mental Fatigue
Source: MDPI journal article supplement (doi:10.3390/jcm12113702), 2023-05-26

**Supplementary Table S1: Results.** Results of the logistic regression model for the association

between COVID-19 severity group and cognitive failures as investigated by different items.

Models were corrected by sex, and follow-up time.

| <b>Cognitive failure</b>       | <b><math>\beta</math></b> | <b>SE</b> | <b><i>p</i>-value</b> |
|--------------------------------|---------------------------|-----------|-----------------------|
| <b>ITEM 1</b>                  |                           |           |                       |
| COVID-19 group severity (mild) | 0.06                      | 0.05      | 0.24                  |
| Sex (female)                   | 0.12                      | 0.05      | 0.03                  |
| Follow-up time                 | 0.001                     | 0.002     | 0.49                  |
| <b>ITEM 2</b>                  |                           |           |                       |
| COVID-19 group severity (mild) | 0.05                      | 0.04      | 0.22                  |
| Sex (female)                   | 0.18                      | 0.04      | <0.0001               |
| Follow-up time                 | -0.002                    | 0.001     | 0.09                  |
| <b>ITEM 3</b>                  |                           |           |                       |
| COVID-19 group severity (mild) | 0.02                      | 0.06      | 0.78                  |
| Sex (female)                   | 0.13                      | 0.06      | 0.03                  |
| Follow-up time                 | -0.001                    | 0.002     | 0.57                  |
| <b>ITEM 4</b>                  |                           |           |                       |
| COVID-19 group severity (mild) | -0.03                     | 0.05      | 0.50                  |
| Sex (female)                   | 0.12                      | 0.05      | 0.02                  |
| Follow-up time                 | -0.01                     | 0.0008    | 0.57                  |
| <b>ITEM 5</b>                  |                           |           |                       |
| COVID-19 group severity (mild) | 0.04                      | 0.04      | 0.35                  |
| Sex (female)                   | 0.06                      | 0.04      | 0.11                  |
| Follow-up time                 | 0.0008                    | 0.001     | 0.46                  |
| <b>ITEM 6</b>                  |                           |           |                       |
| COVID-19 group severity (mild) | 0.01                      | 0.02      | 0.36                  |
| Sex (female)                   | 0.03                      | 0.02      | 0.08                  |
| Follow-up time                 | -0.0001                   | 0.0004    | 0.79                  |
| <b>ITEM 7</b>                  |                           |           |                       |
| COVID-19 group severity (mild) | 0.07                      | 0.04      | 0.06                  |
| Sex (female)                   | 0.06                      | 0.03      | 0.10                  |
| Follow-up time                 | -0.0006                   | 0.001     | 0.57                  |
| <b>ITEM 8</b>                  |                           |           |                       |
| COVID-19 group severity (mild) | 0.04                      | 0.05      | 0.44                  |
| Sex (female)                   | 0.12                      | 0.05      | 0.04                  |
| Follow-up time                 | 0.003                     | 0.002     | 0.11                  |
| <b>ITEM 9</b>                  |                           |           |                       |
| COVID-19 group severity (mild) | 0.02                      | 0.03      | 0.55                  |
| Sex (female)                   | 0.06                      | 0.03      | 0.09                  |
| Follow-up time                 | 0.002                     | 0.001     | 0.03                  |
| <b>ITEM 10</b>                 |                           |           |                       |
| COVID-19 group severity (mild) | 0.03                      | 0.02      | 0.18                  |

|                                |         |        |        |
|--------------------------------|---------|--------|--------|
| Sex (female)                   | 0.05    | 0.02   | 0.05   |
| Follow-up time                 | 0.0006  | 0.0007 | 0.37   |
| <b>ITEM 11</b>                 |         |        |        |
| COVID-19 group severity (mild) | 0.04    | 0.05   | 0.45   |
| Sex (female)                   | 0.17    | 0.05   | 0.0004 |
| Follow-up time                 | 0.002   | 0.001  | 0.26   |
| <b>ITEM 12</b>                 |         |        |        |
| COVID-19 group severity (mild) | 0.009   | 0.01   | 0.43   |
| Sex (female)                   | 0.01    | 0.01   | 0.25   |
| Follow-up time                 | -0.0003 | 0.0003 | 0.33   |
| <b>ITEM 13</b>                 |         |        |        |
| COVID-19 group severity (mild) | 0.002   | 0.02   | 0.92   |
| Sex (female)                   | 0.02    | 0.02   | 0.30   |
| Follow-up time                 | 0.0003  | 0.0006 | 0.64   |
| <b>ITEM 14</b>                 |         |        |        |
| COVID-19 group severity (mild) | 0.009   | 0.01   | 0.43   |
| Sex (femal                     | 0.01    | 0.01   | 0.25   |
| Follow-up time                 | -0.0003 | 0.0003 | 0.32   |
| <b>ITEM 15</b>                 |         |        |        |
| COVID-19 group severity (mild) | 0.03    | 0.04   | 0.45   |
| Sex (female                    | 0.15    | 0.04   | 0.0008 |
| Follow-up time                 | 0.002   | 0.001  | 0.14   |
| <b>ITEM 16</b>                 |         |        |        |
| COVID-19 group severity (mild) | 0.08    | 0.05   | 0.15   |
| Sex (female)                   | 0.17    | 0.05   | 0.003  |
| Follow-up time                 | 0.0004  | 0.002  | 0.82   |
| <b>ITEM 17</b>                 |         |        |        |
| COVID-19 group severity (mild) | 0.04    | 0.03   | 0.21   |
| Sex (female)                   | 0.0009  | 0.03   | 0.98   |
| Follow-up time                 | -0.0009 | 0.001  | 0.35   |
| <b>ITEM 19</b>                 |         |        |        |
| COVID-19 group severity (mild) | 0.03    | 0.03   | 0.33   |
| Sex (female                    | 0.03    | 0.03   | 0.27   |
| Follow-up time                 | 0.0007  | 0.0008 | 0.38   |

**Supplementary Table S2: Electrolytics imbalance.** Characteristics of electrolyte alterations in the four patient groups.

| <i>Na<sup>+</sup></i> |               | COVID-19 severity |              |             |
|-----------------------|---------------|-------------------|--------------|-------------|
|                       |               | <b>hypo</b>       | <b>hyper</b> | <b>both</b> |
| males                 | Severe (N=52) | 21.2%             | 36.%         | 15.4%       |
|                       | Mild (N=73)   | 11%               | 21.9%        | 1.4%        |
|                       |               |                   |              |             |
| females               | Severe (N=20) | 25%               | 25%          | 5%          |
|                       | Mild (N=52)   | 3.8%              | 26.9%        | 1.9%        |

| <i>K<sup>+</sup></i> |               | COVID-19 severity |              |             |
|----------------------|---------------|-------------------|--------------|-------------|
|                      |               | <b>hypo</b>       | <b>hyper</b> | <b>both</b> |
| male                 | Severe (N=52) | 28.8%             | 15.4%        | 15.4%       |
|                      | Mild (N=73)   | 12.3%             | 17.8%        | 6.8%        |
|                      |               |                   |              |             |
| female               | Severe (N=20) | 55%               | 10%          | 15%         |
|                      | Mild (N=52)   | 25%               | 11.5%        | 1.9%        |

| <i>Cl<sup>-</sup></i> |               | COVID-19 severity |              |             |
|-----------------------|---------------|-------------------|--------------|-------------|
|                       |               | <b>hypo</b>       | <b>hyper</b> | <b>both</b> |
| male                  | Severe (N=52) | 36.5%             | 1.9%         | 0%          |
|                       | Mild (N=73)   | 24.7%             | 4.1%         | 0%          |
|                       |               |                   |              |             |
| female                | Severe (N=20) | 40%               | 0%           | 5%          |
|                       | Mild (N=52)   | 23.1%             | 5.8%         | 0%          |

**Supplementary Figure S1: Cognitive Failures.** Percentage of cognitive failures reported in the four groups.

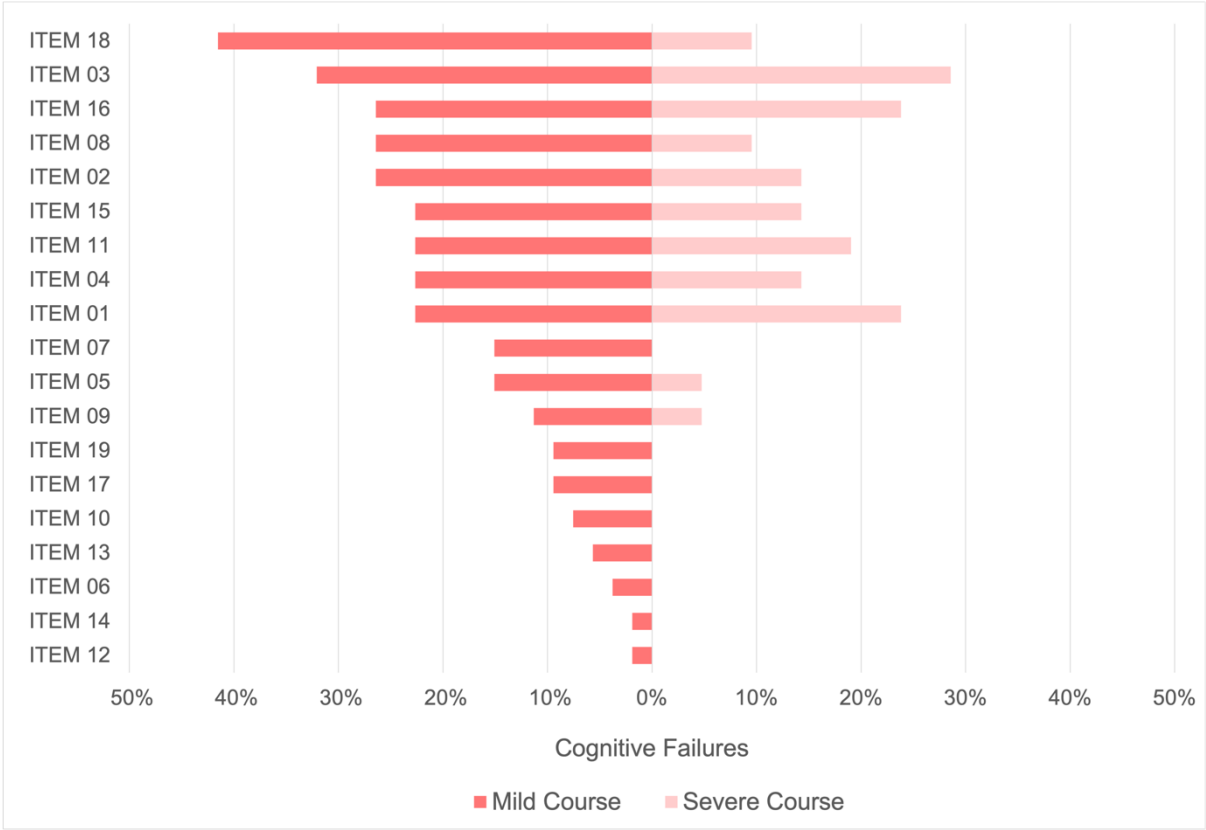

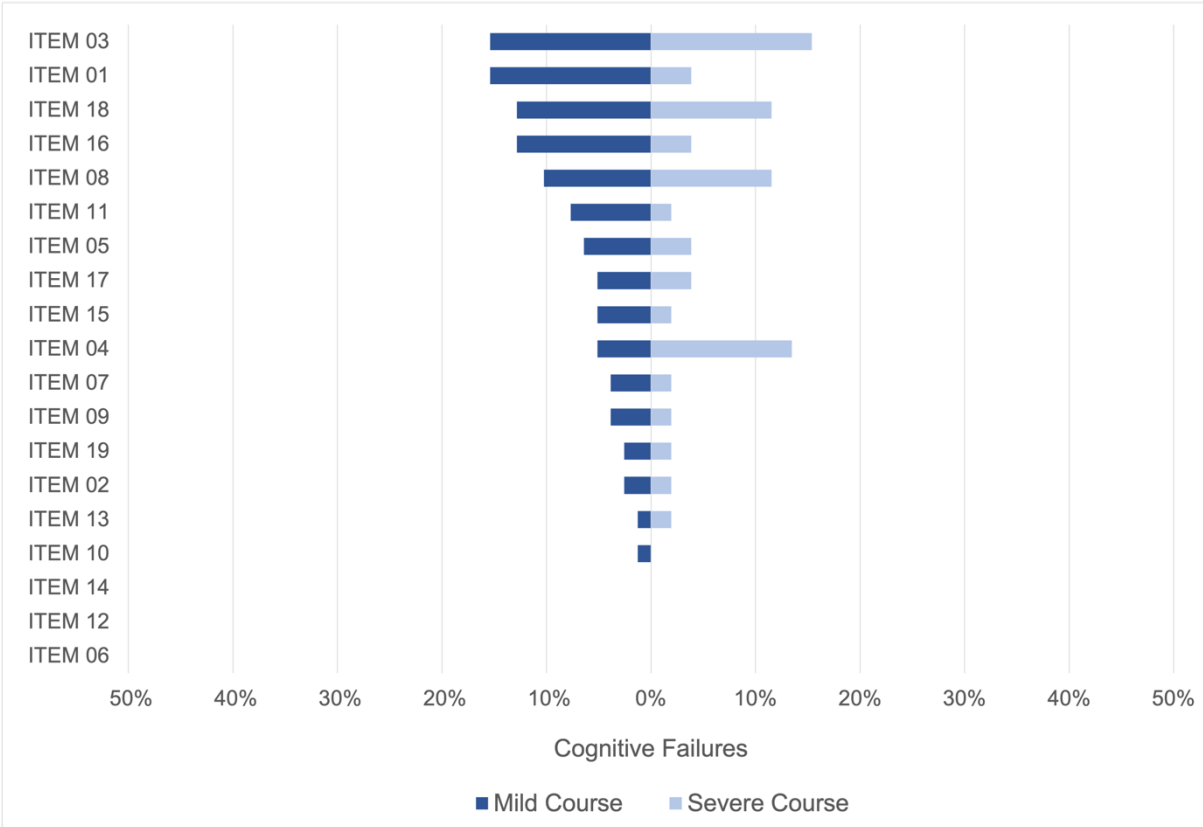

Supplement: s1 [file s1]
